# Supplementary material
Source: Springer Nature journal article supplement (https://www.springermedizin.de/resource/supplementary/12943_2010_711_MOESM3_ESM.pdf/9554634)

**A**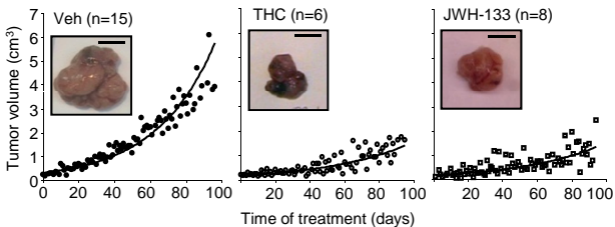**B**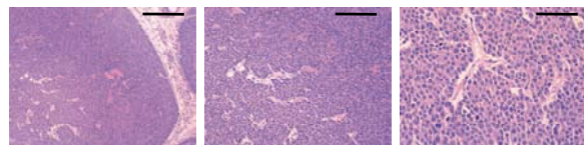**C**

| Tumors/<br>animal | 1   | 2   | 3   | 4 or more |
|-------------------|-----|-----|-----|-----------|
| Control<br>(n=12) | 25% | 8%  | 25% | 41%       |
| THC<br>(n=6)      | 50% | 17% | 33% | 0%        |
| JWH-133<br>(n=6)  | 33% | 50% | 17% | 0%        |

**D**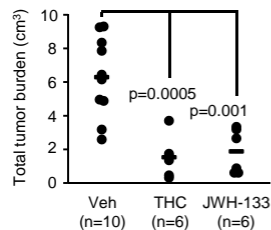**E**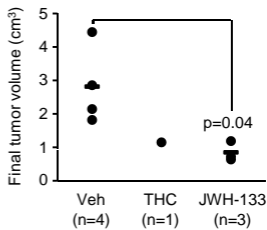

Supplement: MOESM3 [file 9554634]
